# Supplementary material
Source: PubMed Central journal article supplement (PMC6544836)

## Supplemental Information

**Supplemental Table S1: Details of the sequences of the synthetic peptides used is tabulated, the 'p' in each sequence indicates the residue phosphorylated.**

| Label                              | Peptide Sequence                                                                                     |
|------------------------------------|------------------------------------------------------------------------------------------------------|
| Ser <sup>5</sup>                   | H-Tyr-Ser-Pro-Thr- <b>p</b> Ser-Pro-Ser-Tyr-Ser-Pro-NH <sub>2</sub>                                  |
| Tyr <sup>1</sup>                   | H-Thr-Ser-Pro-Ser- <b>p</b> Tyr-Ser-Pro-Thr-Ser-NH <sub>2</sub>                                      |
| Tyr <sup>1</sup> -Ser <sup>5</sup> | H-Tyr-Ser-Pro-Thr- <b>p</b> Ser-Pro-Ser- <b>p</b> Tyr-Ser-Pro-NH <sub>2</sub>                        |
| Thr <sup>4</sup> -Ser <sup>5</sup> | H-Ser-Pro-Ser-Tyr-Ser-Pro-Thr-Ser-Pro-Ser-Tyr-Ser-Pro- <b>p</b> Thr- <b>p</b> Ser-Pro-Ser-Tyr-Ser-OH |
| Ser <sup>2</sup>                   | Ac-Ser-Pro-Ser-Tyr- <b>p</b> Ser-Pro-Thr-Ser-Pro-Ser-NH <sub>2</sub>                                 |
| Ser <sup>2</sup> -Ser <sup>5</sup> | H-Ser-Pro-Ser-Tyr- <b>p</b> Ser-Pro-Thr-Ser-Pro-Ser-Tyr-Ser-Pro-Thr- <b>p</b> Ser-Pro-Ser-Tyr-Ser-OH |
| Tyr <sup>1</sup> -Ser <sup>2</sup> | Ac-Thr-Ser-Pro-Ser- <b>p</b> Tyr- <b>p</b> Ser-Pro-Thr-Ser-Pro-Ser-Tyr-Ser-Pro-NH <sub>2</sub>       |
| Tyr <sup>1</sup> 14-mer            | Ac-Thr-Ser-Pro-Ser- <b>p</b> Tyr-Ser-Pro-Thr-Ser-Pro-Ser-Tyr-Ser-Pro-NH <sub>2</sub>                 |
| Ser <sup>5</sup> 19-mer            | H-Ser-Pro-Ser-Tyr-Ser-Pro-Thr-Ser-Pro-Ser-Tyr-Ser-Pro-Thr- <b>p</b> Ser-Pro-Ser-Tyr-Ser-OH           |
| Ser <sup>5</sup> -Ser <sup>7</sup> | H-Ser-Pro-Ser-Tyr-Ser-Pro-Thr-Ser-Pro-Ser-Tyr-Ser-Pro-Thr- <b>p</b> Ser-Pro- <b>p</b> Ser-Tyr-Ser-OH |

**Supplementary Table S2: Crystallographic Data Collection and Refinement Statistics**

|                                                     |                                                   |
|-----------------------------------------------------|---------------------------------------------------|
|                                                     | Ssu72 C13D/D144N + Symplekin<br>Ser2/Ser5 peptide |
| <b>Data collection</b>                              |                                                   |
| <b>Space group</b>                                  | P4                                                |
| <b>Cell dimensions</b>                              |                                                   |
| <i>a</i> , <i>b</i> , <i>c</i> (Å)                  | 127.70, 127.70, 105.98                            |
| $\alpha$ , $\beta$ , $\gamma$ (°)                   | 90.00, 90.00, 90.00                               |
| Resolution (Å)                                      | 50.00-2.50 (2.54-2.50)*                           |
| <i>R</i> <sub>merge</sub> / <i>R</i> <sub>pim</sub> | 0.108 (0.743)/ 0.053                              |
| <i>I</i> / $\sigma$ <i>I</i>                        | 13.4 (1.5)                                        |
| Completeness (%)                                    | 100.0 (100.0)                                     |
| Redundancy                                          | 5.1 (5.1)                                         |
| <b>Refinement</b>                                   |                                                   |
| Resolution (Å)                                      | 48.95-2.49 (2.55-2.49)                            |
| No. reflections                                     | 59967 (4110)                                      |
| <i>R</i> <sub>work</sub>                            | 0.1958 (0.2711)                                   |
| <i>R</i> <sub>free</sub> <sup>‡</sup>               | 0.2370 (0.3423)                                   |
| <b>No. atoms</b>                                    |                                                   |
| Protein                                             | 8196                                              |
| Ligand/ion                                          | 37                                                |
| Water                                               | 210                                               |
| <b>B-factors (Å<sup>2</sup>)</b>                    |                                                   |
| Protein                                             | 57.5                                              |
| Ligand/ion                                          | 87.7                                              |
| Water                                               | 45.4                                              |
| <b>R.m.s. deviations</b>                            |                                                   |
| Bond lengths (Å)                                    | 0.003                                             |
| Bond angles (°)                                     | 0.497                                             |
| <b>Ramachandran Favored</b> <sup>£</sup>            | 96.3%                                             |

\*Values within parenthesis represent corresponding values in the outermost shell.

<sup>‡</sup>*R*<sub>free</sub> is the *R*<sub>model</sub> calculated for 3.36% of the reflections, a maximum of 2000 reflections were randomly selected and omitted from refinement.

<sup>£</sup>There are only two Ramachandran outliers which correspond to a proline residue (Pro 53 on Chain B) and glycine residue (Gly 58 on Chain A) which shows strong electron density.

**Supplementary Fig. S1 - Amino acid sequences of GST-CTD constructs.** Sequence of CTD portion of GST-CTD constructs used in the manuscript. Sequences presented N to C-terminal as individual heptads.

**GST-tag**

MHHHHHHSSMSPILGYWKIKGLVQPTRLLEYLEEKYEEHLYERDEGDKWRNKKFELGLEFPNLPYYIDGDVK  
 LTQSMAIIRYIADKHNMLGGCPKERAEISMLEGAVLDIRYGVSRAYSKDFETLKVDFLSKLPEMLKMFEDRLC  
 HKTYLNGDHSVTHPDFMLYDALDVVLYMDPMCLDAFPKLVCFKKRIEAIPIQIDKYLKSSKYIAWPLQGWQATF  
 GGDHPPKSSSLEVLVQ/GPGSGM

**yCTD**  
Y<sub>1</sub>S<sub>2</sub>P<sub>3</sub>T<sub>4</sub>S<sub>5</sub>P<sub>6</sub>S<sub>7</sub>

G  
 F G V S S P G  
 F S P T S P T  
 Y S P T S P A  
 Y S P T S P S  
 Y S P T S P S  
 Y S P T S P S  
 Y S P T S P S  
 Y S P T S P S  
 Y S P T S P S  
 Y S P T S P S  
 Y S P T S P S  
 Y S P T S P S  
 Y S P T S P S  
 Y S P T S P S  
 Y S P T S P S  
 Y S P T S P S  
 Y S P T S P A  
 Y S P T S P S  
 Y S P T S P S  
 Y S P T S P S  
 Y S P T S P S  
 Y S P T S P N  
 Y S P T S P S  
 Y S P T S P G  
 Y S P G S P A  
 Y S P K Q D E Q K H N E N E N S R

**5CTD and YtoH 5CTD**  
Y<sub>1</sub> S<sub>2</sub>P<sub>3</sub>T<sub>4</sub>S<sub>5</sub>P<sub>6</sub>S<sub>7</sub>

Y/H S P T S P S  
 Y/H S P T S P S

**3CTD and YtoT 3CTD**  
Y<sub>1</sub> S<sub>2</sub>P<sub>3</sub>T<sub>4</sub>S<sub>5</sub>P<sub>6</sub>S<sub>7</sub>

Y/T S P T S P S  
 Y/T S P T S P S  
 Y/T S P T S P S

**YTSPTSPS,3CTD**

Y<sub>1</sub>T<sub>2</sub>S<sub>3</sub>P<sub>4</sub>T<sub>5</sub>S<sub>6</sub>P<sub>7</sub>S<sub>8</sub>  
 Y T S P T S P S  
 Y T S P T S P S  
 Y T S P T S P S  
 Y

**Supplemental Fig. S2: The structure of Ssu72 binding to CTD peptides.** (A) The 2Fo-FC map (contoured at  $1\sigma$ ) shown as a blue mesh for the Ser2/Ser5 peptide soaked in Ssu72+Symplekin C13D/D144N complex. (B) Ssu72+Symplekin C13D/D144N complex with Ser7 peptide (shown as yellow sticks) as obtained from the previously solved structure (pdb code: 4H3H).

A.

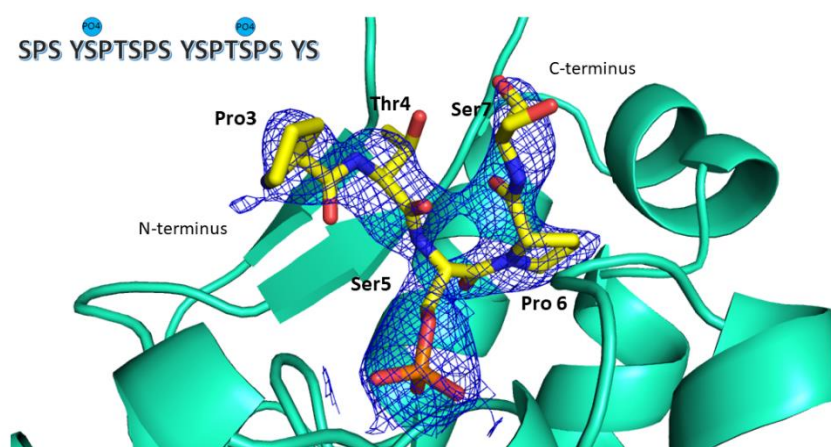

B

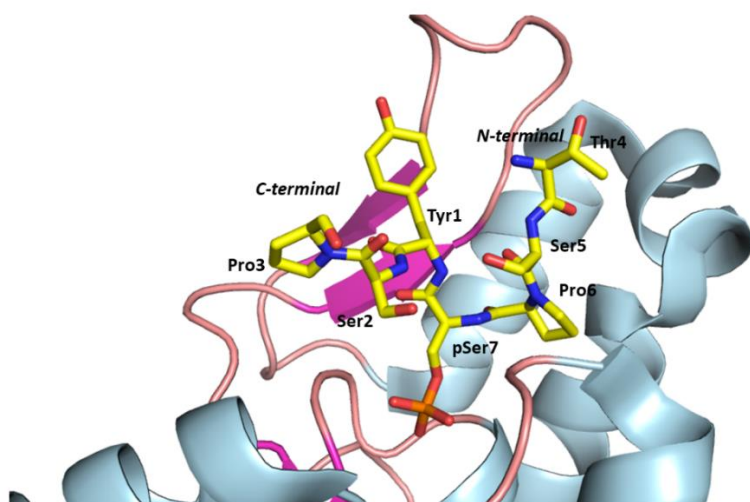

**Supplemental Fig. S3: Eight different rotamers of the histidine (shown in grey sticks) modelled in at the Thr4 position in the Ssu72 complex with Ser2/Ser5 structure (represented Fig 2A). Pro 53 which seems close to the histidine modelled in is shown as blue sticks and the unfavorable Van der Waals interactions have been indicated in terms of the distance between closely positioned atoms.**

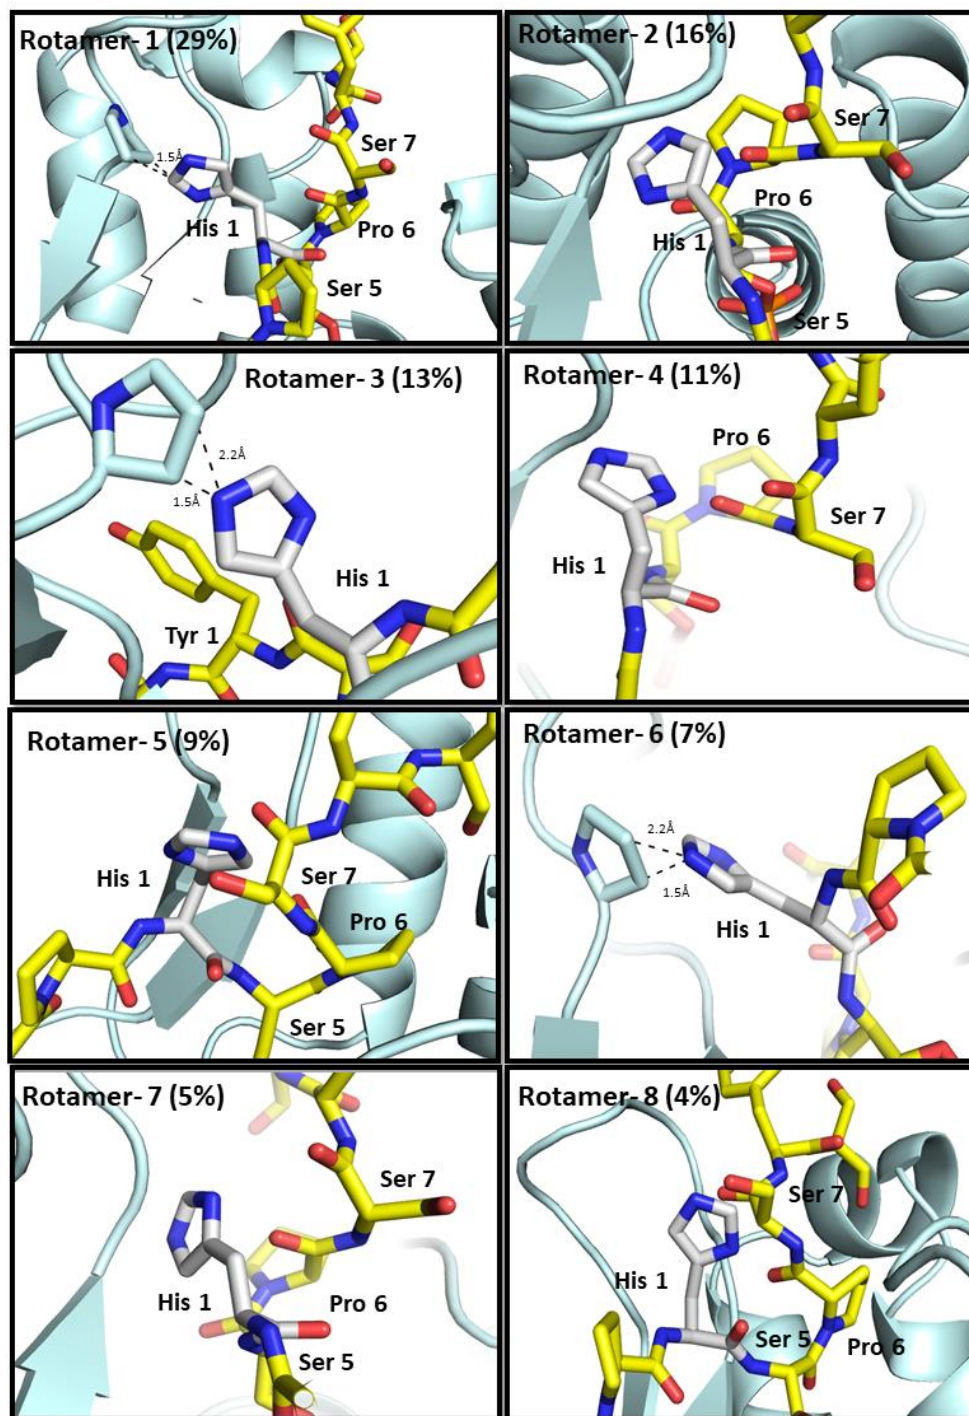

**Supplemental Fig. S4: Specificity of PTP1B.** Mass spectrometry analysis using MALDI-TOF for peptides (sequence of respective synthetic peptides mentioned in the top left hand corner of each graph, phosphorylation of a residue depicted as 'p' before the residue) before treatment with PTP1B, shown in black and after treatment with PTP1B shown in green.

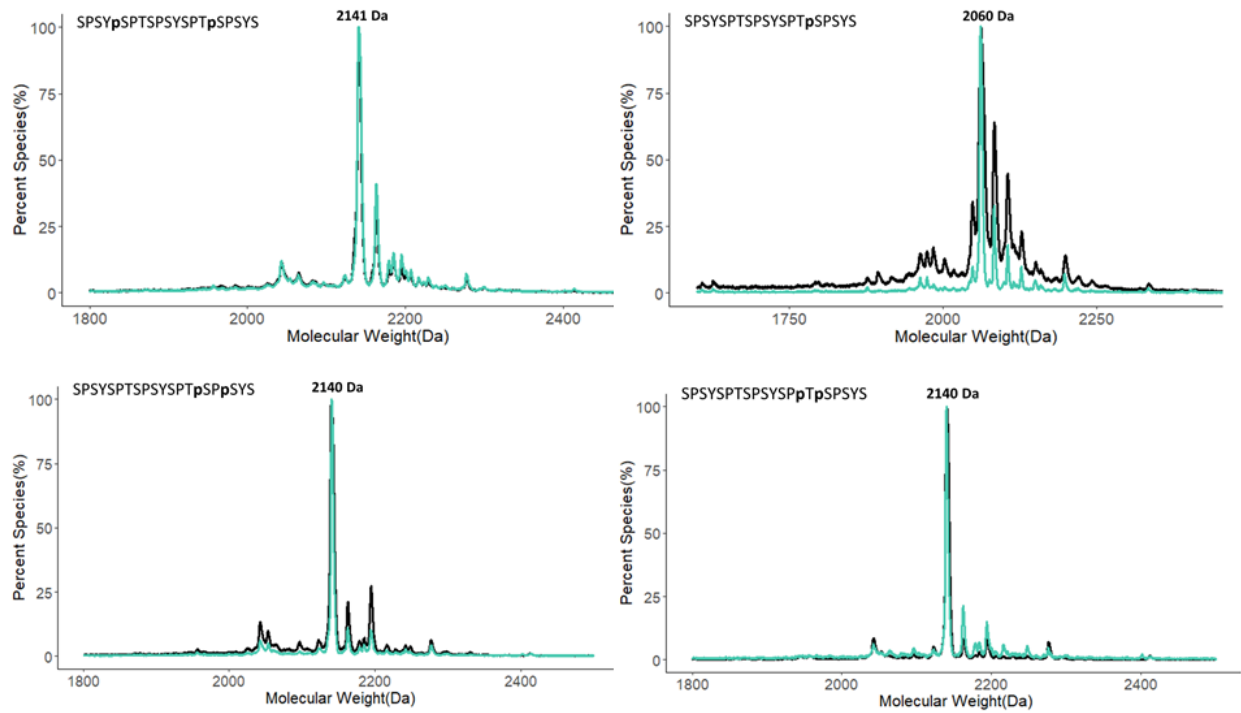

Supplement: supp_RA119.007697_143324_2_supp_310186_pp2dms.pdf [file supp_RA119.007697_143324_2_supp_310186_pp2dms.pdf]
